# Supplementary material for: Comprehensive Behavioral Analysis of Cluster of Differentiation 47 Knockout Mice
Source: PLoS One. 2014 Feb 24;9(2):e89584. doi: 10.1371/journal.pone.0089584 (PMC3933641; doi:10.1371/journal.pone.0089584)
Supplement: Table S1 — Behavioral phenotypes in CD47 KO and SIRP-alpha mutant mice. (XLSX) [file pone.0089584.s001.xlsx]

## Sheet: Sheet1
Table S1. Behavioral phenotypes in CD47 KO and SIRP-alpha mutant mice.
			Nociception	Motor Function		Anxiety-like Behavior			Depression-like Behavior		Social Behavior			Sensorimotor Gating	Learning and Memory
		General health test	Hot plate test	Rotarod test	Gait analysis test	Open field test	Elevated plus maze test	Light/dark transition test	Tail suspension test	Forced swim test	Social interaction test (Crawley’s version)	Social interaction test (novel environment)	Social interaction test (home cage)	Startle response/ PPI	Barne's maze test	Fear conditioning test	Radial maze test	Inhibitory avoidance test
CD47 KO mice	Present study	No effect	No effect	No effect	Narrower stance width for front and hind paws; Narrower paw angles for hind paws	Increased center time during the earlier part of the experimental period	No effect	No effect	No effect	N.D.	Decreased social interactions and novel preference; Increased locomotor activity	No effect	No effect	Decreased PPI	No effect	No effect	N.D.	N.D.
	Ohnishi et al. [21]	N.D.	N.D.	N.D.	N.D.	N.D.	N.D.	N.D.	N.D.	Increased time immobile	N.D.	N.D.	N.D.	N.D.	N.D.	N.D.	N.D.	N.D.
	Chang et al. [23]	No effect	N.D.	No effect	N.D.	N.D.	N.D.	N.D.	N.D.	N.D.	N.D.	N.D.	N.D.	N.D.	N.D.	N.D.	N.D.	Impaired memory retention
CD47 antisense-injected rats	Huang et al. [22]	N.D.	N.D.	N.D.	N.D.	N.D.	N.D.	N.D.	N.D.	N.D.	N.D.	N.D.	N.D.	N.D.	N.D.	N.D.	N.D.	Impaired memory retention
SIRP-alpha mutant mice	Ohnishi et al. [21]	No effect*	No effect*	No effect*	N.D.	No effect	No effect*	No effect*	No effect	Increased time immobile	N.D.	No effect*	No effect*	No effect*	N.D.	No effect*	No effect*	N.D.
No effect: No significant difference observed
N.D.: Not determined
*Mouse Phenotype Database (http://www.mouse-phenotype.org)
